## 10 **Abstract**

11 Coral reef organisms are exposed to both an increasing magnitude of  $p\text{CO}_2$  and natural  
12 fluctuations on a diel scale. For coral reef fishes, one of the most profound effects of ocean  
13 acidification is the impact on ecologically important behaviors. Previous behavioral research has  
14 primarily been conducted under static  $p\text{CO}_2$  conditions and have recently come under criticism.  
15 Recent studies have provided evidence that the negative impacts on behavior may be reduced  
16 under more environmentally realistic, fluctuating conditions. We investigated the impact of both  
17 present and future day, static (500 and 1000  $\mu\text{atm}$ ) and diel fluctuating (500  $\pm$  200 and 1000  $\pm$   
18 200  $\mu\text{atm}$ )  $p\text{CO}_2$  on the lateralization and chemosensory behavior of juvenile anemonefish,  
19 *Amphiprion percula*. Our static experimental comparisons support previous findings that under  
20 elevated  $p\text{CO}_2$ , fish become un-lateralized and lose the ability to discriminate olfactory cues.  
21 Diel-fluctuating  $p\text{CO}_2$  may aid in mitigating the severity of some behavioral abnormalities such  
22 as the chemosensory response, where a preference for predator cues was significantly reduced  
23 under a future diel-fluctuating  $p\text{CO}_2$  regime. This research aids in ground truthing earlier  
24 findings and contributes to our growing knowledge of the role of fluctuating conditions.

25

## 26 **1. Introduction**

27 Anthropogenic climate change is rapidly altering Earth's oceans, leading to the phenomenon of  
28 ocean acidification (OA). The burning of fossil fuels from human activities is exhausting  
29 excessive concentrations of carbon dioxide ( $\text{CO}_2$ ) into the atmosphere at an unprecedented rate  
30 (Kerr 2010). The ocean sequesters atmospheric  $\text{CO}_2$  by uptaking over one third of anthropogenic  
31  $\text{CO}_2$  emissions (Sabine et al. 2004; Rhein et al. 2013). The additional input of atmospheric  $\text{CO}_2$   
32 reacts with seawater to acidify the oceans (Hoegh-Guldberg et al. 2007; Doney et al. 2009).

33 From the pre-industrial era, global ocean pH has decreased by at least 0.1 units (Wootton et al.  
34 2008). Under “business as usual” conditions, it is forecasted that ocean pH will decrease by up to  
35 0.43 units by the end of the century (RCP8.5 scenario; IPCC 2014). If these future projections  
36 hold true, changes in ocean carbonate chemistry will be unlike any past event (Hönisch et al.  
37 2012).

38 Ocean acidification has been shown to affect the sensory system, physiology, and behavior of  
39 marine fishes (Heuer and Grosell 2014; Ashur et al. 2017; Cattano et al. 2018). Some of the most  
40 notable effects of OA on coral reef fishes are on ecologically important behaviors (Nagelkerken  
41 and Munday 2016). These behavioral changes include disruption to olfactory preferences  
42 (Munday et al. 2009; Dixson et al. 2010; Ferrari et al. 2012a), reduced prey detection (Cripps et  
43 al. 2011), decreased learning ability (Ferrari et al. 2012b), reduced behavioral lateralization  
44 (Domenici et al. 2012, 2014; Nilsson et al. 2012), increased activity and boldness (Munday et al.  
45 2010, 2014; Nilsson et al. 2012; Nagelkerken and Munday 2016), reduced hearing and vision  
46 (Simpson et al. 2011; Chung et al. 2014), and altered reaction times, escape speeds and distances  
47 (Allan et al. 2013, 2017; Munday et al. 2016). Furthermore, elevated CO<sub>2</sub> exposure can affect  
48 coral reef fish settlement behavior (Devine et al. 2012), shoaling behavior (Nadler et al. 2016),  
49 habitat preference (Devine and Munday 2013; Nagelkerken and Munday 2016; Goldenburg et al.  
50 2018), and the replenishment of fish stocks (Munday et al. 2010).

51 The effect of OA on coral reef fish juveniles is not ubiquitous across all species, even within the  
52 same genus, with some being more tolerant to increased CO<sub>2</sub> than others (Ferrari et al. 2011;  
53 McCormick et al. 2013). An analysis of the OA literature shows large variation in the sensitivity  
54 of behavioral responses to OA, at habitat and environmental scales, as well as interspecific and

55 intraspecific scales (McCormick et al. 2013; Clements and Hunt 2015; Schunter et al. 2016;  
56 Vargas et al. 2017; Cattano et al. 2018; Munday et al. 2019, Munday et al. 2020).

57 The impacts of future climate change scenarios on coral reef fish behavior are not yet completely  
58 understood. Stressors such as OA occur under fluctuating regimes and in synergy with other  
59 stressors. Marine organisms experience a range of pH variability on both temporal and spatial  
60 scales dependent on their environment, and these fluctuations are expected to be exacerbated  
61 under future climate change conditions (Hofmann et al. 2011; Johnson et al. 2013; Shaw et al.  
62 2013; Kapsenberg et al. 2015; McNeil and Matsumoto 2019). Coral reefs experience diel  $p\text{CO}_2$   
63 fluctuations due to a range of processes including biological reef metabolism (Waldbusser and  
64 Salisbury 2014), as well as seasonal variability, ranging greater than 200  $\mu\text{atm}$  at times  
65 (Shamberger et al. 2011; Price et al. 2012; Albright et al. 2013; Duarte et al. 2013; Kline et al.  
66 2015). Furthermore, fish seldom remain in one location and will likely experience a wide range  
67 of pH variability over their life history due to movement around and off the reef, and ecosystem  
68 structure and function can vary across different locations on reefs due to variability in pH (Price  
69 et al. 2012; Shaw et al. 2013). There is evidence to suggest that temporary movement to another  
70 water source (e.g. from an area of low pH to an area of higher pH) will not immediately  
71 influence the behavioral changes resulting from elevated  $\text{CO}_2$  (Munday et al. 2016).

72 The majority of previous studies have assessed behavioral changes using static OA treatment  
73 conditions, however, considering the importance of better reflecting the natural environment, a  
74 greater understanding of the impacts fluctuating conditions have on behavior is required. Little  
75 research has been conducted on the impact fluctuating stressors may have on the behavior of  
76 coral reef fish. Recent studies have shown that diel pH fluctuations may offset or reduce the  
77 severity of behavioral changes when compared to static future OA conditions (Ou et al. 2015;

78 Jarrold et al. 2017; Jarrold and Munday 2018) suggesting that the findings of earlier research  
79 (conducted under static OA conditions) may have overestimated the degree of behavioral  
80 impairment.

81 Key behavioral traits exhibited by coral reef fishes such as behavioral lateralization and  
82 chemosensory response have primarily been studied under static OA conditions (Munday et al.  
83 2009, 2010, 2013; Dixson et al. 2010; Cripps et al. 2011; Ferrari et al. 2011, 2012a, 2012b;  
84 Devine et al. 2012; Domenici et al. 2012, 2014; Nilsson et al. 2012; Devine and Munday 2013;  
85 Welch et al. 2014). These behaviors play important ecological roles and are often crucial for  
86 survival. The inability to generalize OA findings has resulted in a challenge to the understanding  
87 of the behavioral impacts of OA on coral reef fishes, with differing results collected on  
88 alternative species, life history stages, methods and testing apparatus being used (Munday et al.  
89 2020). These discrepancies make it important to revisit and accurately replicate previous studies  
90 to determine if earlier findings hold true, while still advancing the research field through the  
91 inclusion of diel fluctuations. Technological advancements have now made it possible to test  
92 these behavioral traits under more realistic and biologically relevant environmental conditions. It  
93 is largely unknown if, and to what degree, the brief release from low pH in the evenings will  
94 offset the negative effects of OA. The objectives of this research were to assess the impacts  
95 future climate change conditions will have on the behavior of juvenile coral reef fish,  
96 *Amphiprion percula*, under both static conditions (to revisit and replicate previous findings) and  
97 under more ecologically relevant conditions (i.e. fluctuating conditions). Two experimental trials  
98 were conducted investigating: 1) behavioral lateralization; 2) the chemosensory response.

## 99 **2. Materials and Methods**

### 100 2.1. Study Species:

101 A total of 169 chemically naïve, laboratory bred juvenile *Amphiprion percula* were sourced from  
102 Sustainable Aquatics (Jefferson City, TN). All fish were bred from wild stock parents that were  
103 randomized to include the offspring of three parental groups to account for any genetic  
104 differences. Fish were 18 weeks old at the commencement of the experiment. Juvenile *A. percula*  
105 were fed 0.8 mm pellets (Sustainable Aquatics) and *Artemia* sp. nauplii daily in the morning of  
106 the first two weeks, before transitioning to a pellet-only diet during behavioral trials. During  
107 behavioral trials, fish were fed at the end of the trial period on test days. Fish were maintained on  
108 a 12:12 hr light:dark cycle.

109

### 110 2.2. Experimental Design and Protocol:

111 The impact of static and fluctuating OA on behavioral changes was assessed using current day  
112 static temperature (28.5 °C) with a 2 × 2 cross-factorial design. Treatment groups included: 1)  
113 static present-day control conditions; 2) static future-day acidification conditions; 3) fluctuating  
114 present-day control conditions; and 4) fluctuating future-day acidification conditions. Each  
115 treatment group consisted of 5 replicate 20 L aquariums (26 cm × 26 cm × 31 cm) holding 7-9 *A.*  
116 *percula*. Juveniles were habituated to their treatment conditions for 15 days prior to  
117 commencement of behavioral trials. A habituation timeframe of 4-7 days has proven to be  
118 sufficient to impair a range of behavioral responses (Munday et al. 2010; Devine and Munday  
119 2013; Chivers et al. 2014).

120 Aquaria were separated into one of two large re-circulating systems (111 cm × 248 cm × 22 cm),  
121 each holding two treatment groups in a water bath. Natural seawater was used and sourced from

122 the Indian River Inlet (Delaware, USA). A header sump (680 L) pumped water into each of the  
123 aquaria at an adjusted flow rate ( $75 \text{ mL min}^{-1}$ ). Four APEX Fusion systems (Neptune Systems)  
124 were used to independently control temperature and  $\text{pH}_{\text{NBS}}$  based on programmed set points.  $\text{CO}_2$   
125 was regulated and monitored using an APEX computer system. This system injects additional  
126  $\text{CO}_2$  when pH levels exceed the desired computer set point by opening a solenoid connected to a  
127 precision needle valve. A steady slow stream of  $\text{CO}_2$  was bubbled into the tank through an air  
128 stone until the pH has dropped below the set maximum.  $\text{CO}_2$ -stripped air (achieved using a soda  
129 lime filter) was also bubbled into each aquarium system at a controlled flow rate to raise and  
130 maintain pH at desired values. Both control and future day treatments used the same methods,  
131 however pH set points for each varied. Temperature was monitored at 2 min intervals using  
132 Neptune temperature probes controlled by the APEX system and adjusted with 200 W heaters  
133 (ViaAqua) placed in each tank. When the temperature probe read below the desired set point,  
134 power was turned on to the tank's heater, and the heater was then turned off when the  
135 temperature reached the set point.

136 Both pH and temperature were independently tested twice daily using a handheld Mettler Toledo  
137 probe (SevenGo Duo pro SG68 pH meter). Salinity was tested twice daily using a handheld  
138 refractometer (Fisherbrand Salinity Refractometer). Partial water changes were performed every  
139 second day to control for salinity. Water quality testing (ammonia, nitrate, nitrite) was conducted  
140 twice weekly.

141

142 2.3. Carbonate Chemistry:

143 Juvenile *A. percula* were treated for 15 days (4<sup>th</sup> - 19<sup>th</sup> Nov 2019) in either static present day (500  
144  $\mu\text{atm}$ ), static future day (1000  $\mu\text{atm}$ ), fluctuating present day (1000  $\pm$  200  $\mu\text{atm}$ ), or fluctuating  
145 future day (500  $\pm$  200  $\mu\text{atm}$ ) CO<sub>2</sub> treatments at a current day static temperature of 28.5 °C (Table  
146 1). Treatment continued throughout the next 15 days during the behavioral trial period (20<sup>th</sup> Nov  
147 - 4<sup>th</sup> Dec 2019). The control pH levels were based on the averages of five present-day reef  
148 systems (Fig. 1; Hofmann et al. 2011; Albright et al. 2013). The targeted static future day  
149 treatment values ( $\sim$ 1000  $\mu\text{atm}$ ) were based on commonly used forecast open ocean values for the  
150 end of the century (Kroeker et al. 2013; IPCC 2014). Coral reef  $p\text{CO}_2$  fluctuations can typically  
151 range between  $\pm$ 50-150  $\mu\text{atm}$  on a diel scale (Albright et al. 2013; Kline et al. 2015). The  
152 magnitude in range of fluctuations is forecast to increase in the future (McNeil and Sasse 2016),  
153 and this experiment aimed for a range of  $\pm$ 200  $\mu\text{atm}$ , as seen in Jarrold et al. (2017). Fluctuating  
154 treatment groups had hourly shifts in  $\text{pH}_{\text{NBS}}$  of 0.01 - 0.02 units to reflect diel fluctuations that  
155 occur on a natural reef (Fig. 1). Future day treatment levels used the control levels as a baseline  
156 and were adjusted to include the forecast values expected to occur in 2100 (IPCC 2014), where  
157 fluctuations were extrapolated to 0.3 units lower than control levels. The  $\text{pH}_{\text{NBS}}$  set points were  
158 determined through prior experimentation and programmed into the APEX system to correspond  
159 with target  $p\text{CO}_2$  values. Temperature levels were based on summer values recorded by Albright  
160 et al. (2013). Throughout the experimental period mean temperature was  $28.54 \pm 0.02$  °C, and  
161 mean salinity was  $34.43 \pm 0.06$  ppm. To determine the carbonate chemistry of each treatment  
162 group, dissolved inorganic carbon (DIC) and pH samples were taken each week. The certified  
163 reference materials provided by the laboratory of Dr. A Dickson (San Diego, CA, USA) with  
164 known DIC were used to validate DIC measurements, and pH was measured  
165 spectrophotometrically (Dickson et al. 2007). DIC and spectrophotometric pH were used to



166 calculate  $p\text{CO}_2$  with the CO2SYS software (Pierrot et al. 2006) using constants K1 and K2  
167 (Mehrbach et al. 1973) and refit by Dickson and Millero (1987). Measurements for the  
168 fluctuating treatments were taken midweek at multiple times to correspond with the highest,  
169 median, and lowest expected  $p\text{CO}_2$  values (Table 1.).

170

#### 171 2.4. Behavioral Trials:

172 Two experimental trials measuring ecologically relevant behaviors were conducted investigating  
173 1) behavioral lateralization, and 2) chemosensory response. Trials were run sequentially, and  
174 each trial was conducted once from a haphazardly selected sample of juvenile fish from each  
175 treatment group. Each individual fish was only tested once per experimental trial. All behavioral  
176 trials were undertaken between 08:00 - 17:00. Additional sensory stimuli were minimized  
177 throughout all trials.

178 Behavioral lateralization, which reflects the tendency for fish to have a left or right turning  
179 preference, was evaluated using a detour test following similar methods to Domenici et al.  
180 (2012). A two-way T-maze was used to measure the turning direction of an individual. Water  
181 from the respective treatment conditions of each fish was used to fill the maze to a depth of 4 cm.  
182 A single fish was placed at one end of the T-maze where it could explore the maze and habituate  
183 for 3 min (n=30). Following the habituation period, the fish was gently coaxed with a plastic rod  
184 (no closer than two body lengths away from the fish) to the middle of the runway, then through  
185 the maze to the end of the runway where it was confronted with a turning choice of either left or  
186 right. Ten consecutive runs were recorded for each fish, and the score of the turning direction  
187 and the degree of lateralization was obtained. Direction choice was determined as the first

188 direction chosen when the fish exited the runway. The observer was kept blind to the treatment  
189 during the trial.

190 An Atema two-channel choice flume (Atema et al. 2002) was used to test the chemosensory  
191 mediated behavior towards predator chemical signals by juvenile *A. percula*, following the  
192 methods of Gerlach et al. (2007). Chemical cues for testing were generated by soaking either a  
193 single predator (*Cephalopholis cyanostigma*) or a single non-predator (*Zebrasoma falvescens*) in  
194 a closed, aerated 10 L seawater system for 2 hr. The seawater used was from the same source as  
195 the seawater in the fish aquaria, which had not been treated during the soak period. The predator  
196 or non-predator was then removed from the water immediately following the soak. Cue water  
197 was then placed in the system to treat the water to the relevant temperature and pH associated  
198 with the fish being tested. This process ranged from 10 - 30 min depending on the treatment  
199 conditions. To run the two-channel choice flume, water from two sources (either predator, non-  
200 predator, or untreated control water) were gravity fed into the flume (13 cm × 4 cm) at 100 mL  
201 min<sup>-1</sup>. Water velocity was controlled using two flow meters, ensuring water was delivered at  
202 equal rates to prevent mixing of the water masses and to achieve laminar flow for the cues. Each  
203 individual fish was isolated in a small 200 mL beaker of associated treatment water for 10 min,  
204 and then gently placed downstream in the flume and given a 2 min habituation period where it  
205 was free to swim throughout the chamber. At the conclusion of the habituation period, the fish's  
206 position on either the right or left side was recorded at 5-second intervals for 2 min. The water  
207 sources were then switched to discount a side preference, and the flume was then given a 1 min  
208 flushing period before the entire 2 min habituation period and 2 min testing period were  
209 repeated. Dye tests were conducted before and after trials and regularly throughout to ensure  
210 laminar flow with no areas of turbulence or eddies. Juvenile fish were haphazardly selected from

211 each treatment group (n=20). Three runs were conducted in the same order for each fish: 1) non-  
212 predator vs. untreated, 2) predator vs. untreated, 3) non-predator vs. predator. All trials were run  
213 double blinded, with both fish treatment group and chemical cues blind to the observer.

214

## 215 2.5. Statistical Analysis

216 To assess both the turning preference of the fish and the strength of lateralization, relative  
217 lateralization ( $L_R$ ) and absolute lateralization ( $L_A$ ) were calculated using established methods  
218 (Bisazza et al. 1998). To compare differences between treatment groups, a Kruskal-Wallis test  
219 was performed on both relative and absolute lateralization, as the static present day data set was  
220 not normal (D'Agostino & Pearson omnibus normality test,  $p = 0.0336$ ). Additionally,  
221 lateralization was also assessed at both the population-level using a generalized linear random-  
222 effects model (GLMM; using the lme4 package in R), and at the individual-level using a chi-  
223 square test, following previously used methods (Roche et al. 2020). Shapiro-Wilk normality tests  
224 were performed on the chemosensory response data. To assess if there was a significant  
225 preference towards a specific cue within a treatment group per chemosensory response trial, one  
226 sample  $t$ -tests were conducted comparing the mean and variance against an expected value of  
227 50%. To compare if there were differences between treatment groups, data was first transformed  
228 using the arcsine (square root) transformation. A one-way ANOVA with Tukey's posthoc test  
229 was run on each of the three different chemosensory trials.

230

## 231 **3. Results**

### 232 3.1. Behavioral lateralization:

233 All treatment groups exhibited a mean left turning preference (Fig. 2A), where fish from the  
234 static future day (SFD) and fluctuating future day (FFD) treatments displayed a higher degree of  
235 mean relative lateralization ( $L_R$ ) (SFD:  $-9.33 \pm 6.49$ , FFD:  $-6.67 \pm 6.80$ ). However, there were no  
236 significant differences between treatments for  $L_R$  (Kruskal-Wallis,  $p = 0.9254$ ), and no treatment  
237 group was lateralized at the population level (GLMM,  $p > 0.05$  for all cases).

238 There were significant differences between treatments for absolute lateralization ( $L_A$ ) (Kruskal-  
239 Wallis,  $p < 0.05$ ). Fish from the static present day (SPD) and fluctuating present day (FPD)  
240 controls exhibited the highest mean values of  $L_A$  (SPD:  $44 \pm 4.54$ , FPD:  $46 \pm 5.27$ ) (Fig. 2B). In  
241 contrast, fish from the static future day and fluctuating future day treatments displayed lower  
242 mean  $L_A$  values (SFD:  $28 \pm 4.25$ , FFD:  $29.33 \pm 4.26$ ). Fish from both present day controls  
243 remained individually lateralized ( $\chi^2$ , SPD:  $p < 0.00001$ , FPD:  $p < 0.000001$ ), whereas fish from  
244 future day treatments lost their individual lateralization ( $\chi^2$ , SFD:  $p = 0.1571$ ; FFD:  $p = 0.0797$ ).  
245 Fish treated with static and fluctuating future day conditions displayed significant differences in  
246  $L_A$  with fish from the static present day control (Kruskal-Wallis,  $p < 0.05$  in both cases), but not  
247 with fish from the fluctuating present day control (Kruskal-Wallis, SFD:  $p = 0.0673$ ; FFD:  $p =$   
248  $0.0544$ ). There were no significant differences in  $L_A$  between both static and fluctuating present  
249 day (Kruskal-Wallis,  $p = 0.8624$ ) and static and fluctuating future day (Kruskal-Wallis,  $p = 1$ )  
250 treatments.

251

### 252 3.2. Chemosensory response:

253 Fish treated with static present day, fluctuating present day, and fluctuating future day seawater  
254 displayed no preference for the chemical cues produced by the non-predator (*Zebrafoma*

255 *falvescens*) when tested against untreated seawater ( $t$ -test,  $p > 0.05$ ), spending between 45.4 -  
256 54.3% (SPD:  $54.3 \pm 2.2\%$ , FPD:  $45.4 \pm 2.1\%$ , FFD:  $49.2 \pm 5.0\%$ ) time in the non-predator  
257 chemical cues (Fig. 3A; Table 2.). Fish in the static future day treatment group showed a  
258 significant preference toward the untreated control water (SFD:  $54.1 \pm 3.2\%$ ;  $t$ -test,  $p = 0.042$ ).  
259 There were no significant differences between treatment groups for time spent in cue (ANOVA,  
260  $p > 0.05$ ; Table 3.).

261 When the predator chemical cue (*Cephalopholis cyanostigma*) was tested against untreated  
262 seawater, fish held in future day conditions displayed a preference for the predator chemical  
263 cues, spending between 53.7 - 63.9% (SFD:  $63.9 \pm 3.3\%$ , FFD:  $53.7 \pm 2.5\%$ ) of their time in the  
264 predator chemical cue (Fig. 3B; Table 2.). A statistically significant preference between predator  
265 cue and control water was identified for the static future day treatment ( $t$ -test,  $p < 0.001$ ) but not  
266 for the fluctuating future day treatment ( $t$ -test,  $p = 0.158$ ). Significant differences in the time  
267 spent in predator cue between treatments were identified (ANOVA,  $p < 1 \times 10^{-8}$ ; Table 3). The  
268 preferences observed in the future day treatments significantly differed in comparison to present  
269 day treatments groups, where fish from the static future day treatment spent significantly more  
270 time in the predator cue compared to the static (ANOVA,  $p < 1 \times 10^{-5}$ ) and fluctuating (ANOVA,  
271  $p < 1 \times 10^{-6}$ ) present day treatments. The same was true for fish in the fluctuating future day  
272 treatment compared to the static (ANOVA,  $p < 0.001$ ) and fluctuating (ANOVA,  $p < 1 \times 10^{-4}$ )  
273 present day treatment groups. There was no significant difference in time spent in predator cue  
274 between fish from the fluctuating future day treatment and static future day treatment (ANOVA,  
275  $p > 0.05$ ; Fig. 3B). Fish from both present day treatments (static and fluctuating) spent  
276 significantly more time in the untreated water over the predator cue ( $t$ -test, SPD:  $p < 0.001$ ; FPD:  
277  $p < 1 \times 10^{-6}$ ), spending 68.5 - 72.6% of their time in the untreated water (SPD:  $68.5 \pm 4.3\%$ , FPD:

278 72.6 ± 3.6%). No significant difference in percent time spent in the predator cue between present  
279 day treatments was found (ANOVA,  $p = 0.888$ ).

280 When comparing the predator chemical cues to the non-predator chemical cues simultaneously  
281 (i.e. *C. cyanostigma* vs. *A. pyroperus*), a significant preference for the predator chemical cue  
282 was displayed by fish treated in static future day conditions ( $t$ -test,  $p < 1 \times 10^{-5}$ ; Fig. 3C),  
283 spending almost three times longer in this cue. The CO<sub>2</sub> treatment of the fish resulted in  
284 significantly different responses to the predator cue (ANOVA,  $p < 1 \times 10^{-11}$ ; Table 3.). Fish from  
285 the static future day treatment spent significantly more time in the predator cue than all other  
286 treatments (ANOVA, SPD:  $p < 1 \times 10^{-7}$ ; FPD:  $p < 1 \times 10^{-7}$ ; FFD:  $p < 0.001$ ). Fish treated under  
287 fluctuating future day conditions displayed no significant preferences for the predator or non-  
288 predator ( $t$ -test,  $p = 0.6111$ ). This was a significantly greater amount of time in comparison to the  
289 static and fluctuating present day treatments (ANOVA,  $p < 0.01$  in both cases), but notably  
290 significantly less time in comparison to the static future day treatment (ANOVA,  $p < 0.001$ ; Fig.  
291 3C). Fish from both present day treatments spent a significant amount of time in the chemical  
292 cues produced by the non-predator over the predator ( $t$ -test, SPD:  $p < 1 \times 10^{-7}$ ; FPD:  $p < 1 \times 10^{-6}$ ),  
293 but this did not significantly differ between the two groups (ANOVA,  $p = 0.9999$ ).

#### 294 **4. Discussion**

295 This study supports most previous research assessing the impact of ocean acidification on  
296 juvenile coral reef fish behavior. In both behavioral trials conducted, fish in the future day  
297 treatments exhibited behavioral changes that are likely deleterious in comparison to fish in  
298 present day treatments. When provided with the option of a predator cue compared to either  
299 untreated control water or non-predator cue, fish from the static future day treatment spent  
300 significantly more time in the predator cue compared to fish treated with present day conditions.

301 Diel  $p\text{CO}_2$  fluctuations had varying impacts on juvenile *A. percula* behavior depending on  
302 whether fish were treated under present day or future day conditions. When comparing  
303 fluctuating conditions with static conditions for fish treated in future day  $p\text{CO}_2$ , fluctuations  
304 reduced the attraction (i.e. amount of time) toward the predator cue. Fish from the fluctuating  
305 future day treatment had no significant preference between the non-predator and predator cues,  
306 where under static future day conditions they preferred the predator cue, thus indicating that  
307 fluctuating conditions may help mitigate the degree of negative behavioral impairment on  
308 chemosensory response. In contrast, fluctuations did not reduce the amount of time fish from  
309 present day treatments spent in the predator cue. These results suggest that natural diel  
310 fluctuations may help mitigate negative behavioral impairment in the future, but under present  
311 day conditions there is no apparent influence on behaviors tested in this study.

312 The results from our behavioral lateralization trials support those of previous findings, where fish  
313 from both future day treatments (static and fluctuating) became un-lateralized, while fish from  
314 present day conditions remained individually lateralized (Domenici et al. 2012, 2014). However,  
315 fluctuating conditions did not appear to mitigate or offset this behavioral change, suggesting  
316 fluctuating conditions may not aid in behavioral lateralization abnormalities. Contrasting this,

317 Jarrold et al. (2017) found that fluctuating future day conditions did reduce the negative  
318 behavioral impairment of *A. percula* becoming un-lateralized in their study. Given the small  
319 number of studies conducted in this field at the time of writing, more research is required to  
320 garner a better picture of how behavioral lateralization may be impacted under more realistic,  
321 future day conditions. Fish from all treatment groups displayed a left turning preference,  
322 differing from previous findings of other juvenile coral reef damselfish that have showed varied  
323 results (Domenici et al. 2012, 2014; Jarrold et al. 2017). Recent research has suggested that  
324 behavioral lateralization, through the methods of a detour test, is not repeatable in fishes (Roche  
325 et al. 2020). When five different species of fish were run multiple times, there was no  
326 repeatability in results. Although we did not repeat behavioral lateralization trials multiple times,  
327 given the high degree of both interspecific and intraspecific sensitivity to OA, this suggestion  
328 may not hold true to all fishes. For example, a recent study found that behavioral lateralization is  
329 repeatable across contexts (McLean and Morell 2020). In this study, relative lateralization was  
330 repeatable for male and female adult *Poecilia reticulata*, and absolute lateralization was  
331 repeatable for males. It is also possible that fish could learn the detour maze or become  
332 unthreatened when placed in the same situation repeatedly. Future day  $p\text{CO}_2$  conditions impacted  
333 the ability of juvenile coral reef fish to discriminate between different cue sources, as fish from  
334 the present day treatments showed an attraction toward the non-predator cue when given the  
335 option between a predator and non-predator cue. A higher percent of time spent in the predator  
336 cue from fish treated with future day  $p\text{CO}_2$  conditions is likely due to a loss of discriminatory  
337 ability rather than an attraction toward the predator cue, supporting previously reported findings  
338 of attraction toward unfamiliar settlement cues and predator cues (Munday et al. 2009, 2016;  
339 Dixson et al. 2010; Nilsson et al. 2012).



340 Changes in chemosensory discrimination may also result in higher mortality rates (Munday et al.  
341 2014). However, our results indicate that naturally occurring diel  $p\text{CO}_2$  fluctuations may, to a  
342 degree, mitigate the impact of these negative behavioral impairments. Jarrold et al. (2017) found  
343 similar reductions in time spent in predator cues under fluctuating conditions for two different  
344 species of juvenile coral reef fish, and other studies have found similar results (Jarrold and  
345 Munday 2018). Although fish in fluctuating future day conditions spent less time in the predator  
346 cue than fish in static future day conditions, their time spent was still higher than fish from both  
347 present day treatments, indicating that although the effect is reduced, it is still an issue of future  
348 concern. Given no significant differences between fluctuating and static conditions for present  
349 day treatments, fluctuations are more likely to play a crucial role in the future.

350 While our results support the overall conclusions of most behavioral studies investigating OA  
351 impacts on coral reef fishes (Munday et al. 2019), our results differ in the magnitude of these  
352 behavioral impairments. For example, the first chemosensory response study to report on  
353 predator detection found that under static future day conditions, settlement stage fish spent all of  
354 their time in predator cue, whereas those in static present day control conditions displayed a  
355 higher predator avoidance and spent no time in predator cue (Dixson et al. 2010). In contrast,  
356 when fish in our study were given the option between predator and non-predator cue, fish from  
357 the static future day treatment and static present day control spent 72.5% and 26.5% of time in  
358 predator cue, respectively. As the same focal species (*Amphiprion percula*), testing apparatus,  
359 and methods were used, a direct comparison can be made, potentially highlighting the role of  
360 juvenile age in response towards cues. Fish tested in Dixson et al. (2010) were treated during the  
361 egg and larval stage and tested at settlement (11 days post hatch), whereas the *A. percula* tested  
362 here were treated only during a two week period of the juvenile stage and tested at 20 weeks post

363 hatch. Sensitivity to OA may likely be greater at earlier stages of ontogeny. As OA can affect  
364 larval processes, settlement and metamorphosis, early life stages represent a critical “bottleneck”  
365 period, meaning behaviors such as those tested in this study may be even more essential for  
366 survival at a younger age (Almany et al. 2006; Espinel-Velasco et al. 2018). Furthermore, our  
367 results suggest that fluctuations appear to provide little, if any, behavioral benefits under present  
368 day conditions. As coral reefs are generally not a homogenous environment,  $p\text{CO}_2$  ranges and  
369 fluctuations may vary both spatially across and within reefs, and temporarily, accounting for  
370 different behavioral and biological responses (Duarte et al. 2013; Boyd et al. 2016; Vargas et al.  
371 2017).

372 As continual exposure to OA over time and movement from high to lower levels of  $p\text{CO}_2$  does  
373 not appear to reduce the negative behavioral impacts (Munday et al. 2014, 2016), fluctuating  
374 conditions and organismal adaptivity should be researched on a local scale, with a key emphasis  
375 on finetuning the different degrees of fluctuations and the important roles they play (Wahl et al.  
376 2016). Given the variability and complexity of coral reefs, it remains largely unknown how  $p\text{CO}_2$   
377 fluctuations may impact behavior, and on a larger scale, ecosystem structure and function  
378 (Queirós et al. 2014; Goldenburg et al. 2018).

379

## 380 **5. Conclusion**

381 The results found here underscore and expand on previous research that has assessed behavioral  
382 abnormalities of *Amphiprion percula* and other coral reef fishes under static future day  $p\text{CO}_2$   
383 conditions (Munday et al. 2009, 2010; Dixson et al. 2010; Domenici et al. 2012; Ferrari et al.  
384 2012a; Nilsson et al. 2012; Allan et al. 2013; Chivers et al. 2014). Furthermore, this study adds

385 to the small yet growing literature suggesting that naturally occurring diel fluctuating  $p\text{CO}_2$   
386 conditions may help mitigate or reduce OA-induced behavioral abnormalities under future  
387 climate change regimes.

388

389 **Acknowledgments**

390 We thank the Dixson Lab for their assistance with experimental design and preparation for  
391 behavioral trials, D. Miller, J. Cohen, and P. Dominici for their assistance with statistical  
392 analysis, and the maintenance staff at the University of Delaware for their logistical assistance.  
393 All research was conducted under the guidelines of IACUC #1292. This research was funded by  
394 the National Science Foundation (Dixson #1750269). Data can be found at Zenodo  
395 (10.5281/zenodo.4459414)

396

397 **References**

398 Albright R., Langdon C., Anthony K.R.N. (2013). Dynamics of seawater carbonate chemistry,  
399 production, and calcification of a coral reef flat, central Great Barrier Reef. *Biogeosciences* 10:  
400 6747-6758.

401 Allan B.J.M., Domenici P., McCormick M.I., Watson S.A., Munday P.L. (2013). Elevated CO<sub>2</sub>  
402 Affects Predator-Prey Interactions through Altered Performance. *PLoS ONE* 8(3): e58520.  
403 doi:10.1371/journal.pone.0058520.

404 Allan B.J.M., Domenici P., Watson S.A., Munday P.L., McCormick M.I. (2017). Warming has a  
405 greater effect than elevated CO<sub>2</sub> on predator–prey interactions in coral reef fish. *Proc. R. Soc. B*  
406 284: 20170784. <http://dx.doi.org/10.1098/rspb.2017.0784>.

407 Almany G.R., Webster M.S. (2006). The predation gauntlet: early post-settlement mortality in  
408 reef fishes. *Coral Reefs* 25, 19–22. doi:10.1007/s00338-005-0044-y.

- 409 Ashur M.M., Johnston N.K., Dixson D.L. (2017). Impacts of Ocean Acidification on Sensory  
410 Function in Marine Organisms. *Integrative and Comparative Biology* 57(1), 63-80.  
411 doi:10.1093/icb/icx010.
- 412 Atema J., Kingsford M.J., Gerlach G. (2002). Larval reef fish could use odour for detection,  
413 retention and orientation to reefs. *Mar Ecol Prog Ser* 241, 151-160.
- 414 Bisazza A., Facchin L., Pignatti R., Vallortigara G. (1998). Lateralization of detour behaviour in  
415 poeciliid fish: The effect of species, gender and sexual motivation. *Behav. Brain Res.* 91:157–  
416 164.
- 417 Boyd P.W., Cornwall C.E., Davison A., Doney S.C., Fourquez M., Hurd C.L., Lime I.D.,  
418 McMinn A. (2016). Biological responses to environmental heterogeneity under future ocean  
419 conditions. *Glob. Chang. Biol.* 22, 2633–2650.
- 420 Cattano C., Claudet J., Domenici P., Milazzo M. (2018). Living in a high CO<sub>2</sub> world: a global  
421 meta-analysis shows multiple trait-mediated fish responses to ocean acidification. *Ecological*  
422 *Monographs* 88(3), 320-335.
- 423 Chivers D.P., McCormick M.I., Nilsson G.E., Munday P.L., Watson S.A., Meekan M.G.,  
424 Mitchell M.D., Corkill K.C., Ferrari M.C. (2014). Impaired learning of predators and lower prey  
425 survival under elevated CO<sub>2</sub>: a consequence of neurotransmitter interference. *Global Change*  
426 *Biology* 20. 515-522.
- 427 Chung W.S., Marshall N.J., Watson S.A., Munday P.L., and Nilsson G.E. (2014). Ocean  
428 acidification slows retinal function in a damselfish through interference with GABA<sub>A</sub> receptors.  
429 *J. Exp. Biol.* 217, 323-326.

- 430 Clements J.C., Hunt H.L. (2015). Marine animal behaviour in a high CO<sub>2</sub> ocean. *Mar. Ecol.*  
431 *Prog. Ser.* 536, 259–279. <https://doi.org/10.3354/meps11426>.
- 432 Cripps I.L., Munday P.L., McCormick M.I. (2011). Ocean acidification affects prey detection by  
433 a predator reef fish. *PLoS One* 6: e22736.
- 434 Devine B.M, Munday P.L., Jones G. (2012). Rising CO<sub>2</sub> concentrations affect settlement  
435 behaviour of larval damselfishes. *Coral Reefs* 31: 229–238.
- 436 Devine B.M., Munday P.L. (2013). Habitat preferences of coral-associated fishes are altered by  
437 short-term exposure to elevated CO<sub>2</sub>. *Marine Biol* 1–8. [https://doi.org/10.1007/s00227-012-](https://doi.org/10.1007/s00227-012-2051-1)  
438 2051-1.
- 439 Dickson A.G., Millero F.J. (1987). A comparison of the equilibrium constants for the  
440 dissociation of carbonic acid in seawater media. *Deep-Sea Res.* 34, 1733–1743.  
441 doi:10.1016/0198-0149(87)90021-5.
- 442 Dickson A.G., Sabine C.L., Christian J.R. (Eds.). (2007). Guide to best practices for ocean CO<sub>2</sub>  
443 measurements. PICES Special Publication 3, 191 pp.
- 444 Dixson D.L., Munday P.L., Jones G.P. (2010). Ocean acidification disrupts the innate ability of  
445 fish to detect predator olfactory cues. *Ecol. Lett.* 13, 68-75.
- 446 Domenici P., Allan B., McCormick M. I., Munday P.L. (2012). Elevated carbon dioxide affects  
447 behavioural lateralization in a coral reef fish. *Biol. Lett.* 8, 78-81.
- 448 Domenici P., Allan B.J.M., Watson S.A., McCormick M.I., Munday P.L. (2014). Shifting from  
449 Right to Left: The Combined Effect of Elevated CO<sub>2</sub> and Temperature on Behavioural  
450 Lateralization in a Coral Reef Fish. *PLoS ONE* 9(1): e87969. doi:10.1371/journal.pone.0087969.

451 Doney S.C., Fabry V.J., Feely R.A., Kleypas J.A. (2009). Ocean acidification: the other CO<sub>2</sub>  
452 problem. *Annual Review of Marine Science* 1: 169–192.

453 Duarte C.M., Hendriks I.E., Moore T.S., Olsen Y.S., Steckbauer A., Ramajo L.,  
454 Carstensen J., Trotter J.A., Mcculloch M. (2013). Is ocean acidification an open-ocean  
455 syndrome? Understanding anthropogenic impacts on seawater pH. *Estuaries Coast* 36: 221–236.

456 Espinel-Velasco N., Hoffmann L., Agüera A., Byrne M., Dupont S., Uthicke S., Webster N.S.,  
457 Lamare M. (2018). Effects of ocean acidification on the settlement and metamorphosis of marine  
458 invertebrate and fish larvae: A review. *Mar. Ecol. Prog. Ser.*

459 Ferrari M.C.O., Dixon, D.L., Munday P.L., McCormick M.I., Meekan M.G., Sih A., Chivers  
460 D.P. (2011). Intrageneric variation in antipredator responses of coral reef fishes affected by  
461 ocean acidification: implications for climate change projections on marine communities. *Global*  
462 *Change Biology* 17:9, 2980-2986. <https://doi.org/10.1111/j.1365-2486.2011.02439.x>.

463 Ferrari M.C.O., McCormick M.I., Munday P.L., Meekan M.G., Dixon D.L., Lönnstedt O.,  
464 Chiver D.P. (2012a). Effects of ocean acidification on visual risk assessment in coral reef fishes.  
465 *Funct Ecol* 26:553-8.

466 Ferrari M.C.O., Manassa R.P., Dixon D.L., Munday P.L., McCormick M.I., Meekan M.G., Sih  
467 A., Chivers D.P. (2012b). Effects of ocean acidification on learning in coral reef fishes. *PLoS*  
468 *ONE* 7, e31478.

469 Gerlach G., Atema J., Kingsford M.J., Black K.P., Miller-Sims V. (2007). Smelling home can  
470 prevent dispersal of reef fish larvae. *Proc. Natl. Acad. Sci.* 104: 858-863.

471 Goldenberg S.U., Nagelkerken I., Marangon E., Bonnet A., Ferreira C.M., Connell S.D. (2018).  
472 Ecological complexity buffers the impacts of future climate on marine consumers. *Nat. Clim.*  
473 *Chang.* 8, 229–233. doi: 10.1038/ s41558-018-0086-0.

474 Heuer R.M., Grosell M. (2014). Physiological impacts of elevated carbon dioxide and ocean  
475 acidification on fish. *Am J Physiol Regul Integr Comp Physiol* 307: R1061–R1084.

476 Hoegh-Guldberg O., Mumby P.J., Hooten A.J., Steneck R.S., Greenfield P., Gomez E., Harvell  
477 D.C., et al. (2007). Coral reefs under rapid climate change and ocean acidification. *Science* 318:  
478 1737-1742.

479 Hofmann G.E., Feely R.A., Fabry V.J., Langdon C., Sabine C.L., Robbins L.L. (2011). High  
480 frequency dynamics of ocean pH: a multi-ecosystem comparison. *PLoS One* 6: e28983.

481 Hönisch B., Ridgwell A., Schmidt D.N., Thomas E., Gibbs S.J., Slujis A., Zeebe R., Kump L.,  
482 Martindale R.C., Greene S.E., Kiessling W., Ries J., Zachos J.C., Royer D.L., Barker S.,  
483 Marchitto Jr. T.M., Moyer R., Pelejero C., Ziveri P., Foster G.L., Williams B. (2012). The  
484 geological record of ocean acidification. *Science* 335, 1058–1063.

485 IPCC (2014): Hoegh-Guldberg O., Cai R., Poloczanska E.S., Brewer P.G., Sundby S., Hilmi K.,  
486 Fabry V.J., Jung S. 2014: The Ocean. In: Climate Change 2014: Impacts, Adaptation, and  
487 Vulnerability. Part B: Regional Aspects. Contribution of Working Group II to the Fifth  
488 Assessment Report of the Intergovernmental Panel on Climate Change [Barros, V.R., C.B. Field,  
489 D.J. Dokken, M.D. Mastrandrea, K.J. Mach, T.E. Bilir, M. Chatterjee, K.L. Ebi, Y.O. Estrada,  
490 R.C. Genova, B. Girma, E.S. Kissel, A.N. Levy, S. MacCracken, P.R. Mastrandrea, and  
491 L.L. White (eds.)]. Cambridge University Press, Cambridge, United Kingdom and New York,  
492 NY, USA, pp. 1655-1731. Jarrold M.D., Humphrey C., McCormick M.I., Munday P.L. (2017).



493 Diel CO<sub>2</sub> cycles reduce severity of behavioural abnormalities in coral reef fish under ocean  
494 acidification. *Scientific Reports* 7: 10153. DOI:10.1038/s41598-017-10378-y.

495 Jarrold M.D., Munday P.L. (2018). Elevated Temperature Does Not Substantially Modify the  
496 Interactive Effects Between Elevated CO<sub>2</sub> and Diel CO<sub>2</sub> Cycles on the Survival, Growth and  
497 Behavior of a Coral Reef Fish. *Front. Mar. Sci.* 5:458. doi: 10.3389/fmars.2018.00458.

498 Johnson Z.I., Wheeler B.J., Blinbery S.K., Carlson C.M., Ward C.S. (2013). Dramatic  
499 Variability of the Carbonate System at a Temperate Coastal Ocean Site (Beaufort, North  
500 Carolina, USA) Is Regulated by Physical and Biogeochemical Processes on Multiple Timescales.  
501 *PLoS One* 8(12). E85117.

502 Kapsenberg L., Kelley A.L., Francis L.A., Raskin S.B. (2015). Exploring the Complexity of  
503 Ocean Acidification: An Ecosystem Comparison of Coastal pH Variability. *Science Scope*;  
504 Washington 39(3), 51-60.

505 Kerr R.A. (2010). Ocean Acidification Unprecedented, Unsettling. *Science* 328(5985), 1500-  
506 1501.

507 Kline D.I., Teneva L., Hauri C., Schneider K., Miard T., Chai A., et al. (2015). Six Month *In*  
508 *Situ* High-Resolution Carbonate Chemistry and Temperature Study on a Coral Reef Flat Reveals  
509 Asynchronous pH and Temperature Anomalies. *PLoS ONE* 10(6): e0127648.  
510 <https://doi.org/10.1371/journal.pone.0127648>.

511 Kroeker K.J., Kordas R.L., Crim R., Hendriks I.E., Ramajo L., Singh G.S., Duarte C.M.,  
512 Gattuso, J-P. (2013). Impacts of ocean acidification on marine organisms: quantifying  
513 sensitivities and interaction with warming. *Global Chang. Biol.* 19(6), 1884–1896.

- 514 McCormick M.I., Watson S-A., Munday P.L. (2013). Ocean acidification reverses competition  
515 for space as habitats degrade. *Scientific Reports* 3:03280. doi:10.1038/srep03280.
- 516 McLean S., Morrell L.J. (2020). Consistency in the strength of laterality in male, but not female,  
517 guppies across different behavioural contexts. *Biol. Lett.* 16: 20190870.  
518 <http://dx.doi.org/10.1098/rsbl.2019.0870>.
- 519 McNeil B.I., Sasse T.P. (2016). Future ocean hypercapnia driven by anthropogenic amplification  
520 of the natural CO<sub>2</sub> cycle. *Nature* 529, 383-386.
- 521 McNeil B., Matsumoto K. (2019). The changing ocean and freshwater CO<sub>2</sub> system. In: Groswell  
522 M., Munday P.L., Farrell A.P., Brauner, C.J. (Eds.), Carbon Dioxide. Fish Physiology vol 37.  
523 Academic Press, San Diego.
- 524 Mehrbach C., Culbertson C., Hawley J., Pytkowicz R. (1973). Measurement of the apparent  
525 dissociation constants of carbonic acid in seawater at atmospheric pressure. *Limnol. Oceanogr.*  
526 897–907. doi:10.4319/lo.1973.18.6.0897.
- 527 Munday P.L., Dixson D.L., Donelson J.M., Jones G.P., Pratchett M.S., Devitsina G.V., Døving  
528 K.B. (2009). Ocean acidification impairs olfactory discrimination and homing ability of a marine  
529 fish. *Proc. Natl. Acad. Sci. USA* 106, 1848-1852.
- 530 Munday P.L., Dixson D.L., McCormick M.I., Meekan M., Ferrari M.C.O., Chivers D.P. (2010).  
531 Replenishment of fish populations is threatened by ocean acidification. *Proc. Natl. Acad. Sci.*  
532 *USA* 107, 12930-12934.

533 Munday P.L., Pratchett M.S., Dixon D.L., Donelson J.M., Endo G.G. K., Reynolds A.D.,  
534 Knuckey R. (2013). Elevated CO<sub>2</sub> affects the behavior of an ecologically and economically  
535 important coral reef fish. *Marine Biology* 160, 2137-2144.

536 Munday P.L., Cheal A.J., Dixon D.L., Rummer J.L., Fabricius K.E. (2014). Behavioral  
537 impairments in reef fishes caused by ocean acidification at CO<sub>2</sub> seeps. *Nature Climate Change* 4:  
538 487-492.

539 Munday P.L., Welch M.J., Allan B.J.M., Watson S.A., McMahon S.J., McCormick M.I. (2016).  
540 Effects of elevated CO<sub>2</sub> on predator avoidance behaviour by reef fishes is not altered by  
541 experimental test water. *PeerJ* 4:e2501 <https://doi.org/10.7717/peerj.2501>.

542 Munday P.L., Jarrold M.D., Nagelkerkan, I. Ecological effects of elevated CO<sub>2</sub> on marine and  
543 freshwater fishes: from individual to community effects. *Fish Physiology* 37. Academic Press,  
544 San Diego (2019).

545 Munday P.L., Dixon D.L., Welch M.J. *et al.* (2020). Methods matter in repeating ocean  
546 acidification studies. *Nature* 586, E20–E24. <https://doi.org/10.1038/s41586-020-2803-x>Nadler  
547 L.E., Killen S.S., McCormick M.I., Watson S., Munday P.L. (2016). Effect of elevated carbon  
548 dioxide on shoal familiarity and metabolism in a coral reef fish. *Conserv. Physiol.* 4.  
549 <https://doi.org/10.1093/conphys/cow052>.

550 Nagelkerken I., Munday P.L. (2016). Animal behaviour shapes the ecological effects of ocean  
551 acidification and warming: moving from individual to community-level responses. *Glob Chang*  
552 *Biol* 22(3): 974-89.

553 Nilsson G.E., Dixon D.L., Domenici P., McCormick M.I., Sorensen C., Watson S.A., Munday  
554 P.L. (2012). Near-future carbon dioxide levels alter fish behaviour by interfering with  
555 neurotransmitter function. *Nature Climate Change* 2. 201-204.

556 Ou M., Hamilton T.J., Eom J., Lyall E.M., Gallup J., Jiang A., Lee J., Close D.A., Yun S.,  
557 Brauner C.J. (2015). Responses of pink salmon to CO<sub>2</sub>-induced aquatic acidification. *Nat. Clim.*  
558 *Chang.* 5, 950-955.

559 Pierrot, D., E. Lewis, and D. W. R. Wallace. 2006. MS Excel program developed for CO<sub>2</sub> system  
560 calculations. Oak Ridge, Tennessee, USA. Retrieved from: [https://cdiac.ess-](https://cdiac.ess-dive.lbl.gov/ftp/co2sys/)  
561 [dive.lbl.gov/ftp/co2sys/](https://cdiac.ess-dive.lbl.gov/ftp/co2sys/).

562 Price N.N., Martz T.R., Brainard R.E., Smith J.E. (2012). Diel Variability in Seawater pH  
563 Relates to Calcification and Benthic Community Structure on Coral Reefs. *PLoS ONE* 7(8):  
564 e43843. <https://doi.org/10.1371/journal.pone.004384>.

565 Queirós A.M., Fernandes J.A., Faulwetter S., Nunes J., Rastrick S.P.S., Mieszkowska N., Artioli  
566 Y., Yool A., Calosi P., Arvanitidis C., Findlay H.S., Barange M., Cheung W.W.L., Widdicombe  
567 S. (2014). Scaling up experimental ocean acidification and warming research: from individuals  
568 to the ecosystem. *Global Change Biology* 21, 1. <https://doi.org/10.1111/gcb.12675>.

569 Rhein M., Rintoul S.R., Aoki S., Campos E., Chambers D., Feely R.A., Gulev S., Johnson G.C.,  
570 Josey S.A., Kostianov A., Mauritzen C., Roemmich D., Talley L.D., Wang T.F. (2013).  
571 Observations: Ocean. In *Climate change 2013: The physical science basis. Contribution of*  
572 *Working Group I to the Fifth Assessment Report of the Intergovernmental Panel on Climate*  
573 *Change*, ed. T.F. Stocker, D. Qin, G.-K. Plattner, M. Tignor, S.K. Allen, J. Boschung, A. Nauels,  
574 Y. Xia, V. Bex and P.M. Midgley. Cambridge, UK: Cambridge University Press.

575 Rogelj J., Den Elzen M., Höhne N., Fransen T., Fekete H., Winkler H., Schaeffer R., Sha F.,  
576 Riahi K., Meinshausen M. (2016). Paris Agreement climate proposals need a  
577 boost to keep warming well below 2 °C. *Nature* 534, 631.

578 Roche D.G., Amcoff M., Morgan R., Sundin J., Andreassen A.H., Finnøen M.H., Lawrence  
579 M.J., Henderson E., Norin T., Speers-Roesch B., Brown C., Clark T.D., Bshary R., Leung B.,  
580 Jutfelt F., Binning S.A. (2020). Behavioural lateralization in a detour test is not repeatable in  
581 fishes. *Animal Behavior* 167, 55-64. <https://doi.org/10.1016/j.anbehav.2020.06.025>.

582 Rogers L. J. (2002). Advantages and disadvantages of lateralization. In *Comparative vertebrate*  
583 *lateralization* (eds L. J. Rogers & R. J. Andrew), pp. 126–153. Cambridge, UK: Cambridge  
584 University Press.

585 Sabine, C.L., Feely R.A., Gruber N., Key R.M., Lee K., Bullister J.L., Wanninkhof R., Wong  
586 C.S., Wallace D.W.R., Tilbrook B., Millero F.J., Peng T-H., Kozyr A., Ono T., Rios A.F. (2004).  
587 The oceanic sink for anthropogenic CO<sub>2</sub>. *Science* 16:305(5682), 367-371. doi:  
588 10.1126/science.1097403.

589 Schunter C., Welch M.J., Ryu T., Zhang H., Berumen M.L., Nilsson G.E., Munday P.L., Ravasi  
590 T. (2016). Molecular signatures of transgenerational response to ocean acidification in a species  
591 of reef fish. *Nature Climate Change* 6, 1014-1018. doi:10.1038/nclimate3087.

592 Shamberger K.E.F., Feely R.A., Sabine C.L., et al. (2011). Calcification and organic production  
593 on a Hawaiian coral reef. *Marine Chemistry* 127, 64–75.

594 Shaw E.C., Mcneil B.I., Tilbrook B., Matear R., Bates M.L. (2013). Anthropogenic changes to  
595 seawater buffer capacity combined with natural reef metabolism induce extreme future coral reef  
596 CO<sub>2</sub> conditions. *Global Change Biology* 19, 1632–1641.

597 Simpson S.D., Munday P.L., Wittenrich M.L., Manassa R., Dixson D.L., Gagliano M., Yan H.Y.  
598 (2011). Ocean acidification erodes crucial auditory behaviour in a marine fish. *Biol. Lett.* 7, 917-  
599 920.

600 Vargas C., Lagos N., Lardies M. *et al.* (2017). Species-specific responses to ocean acidification  
601 should account for local adaptation and adaptive plasticity. *Nat Ecol Evol* 1, 0084.  
602 <https://doi.org/10.1038/s41559-017-0084>.

603 Wahl M., Saderne V., Sawall Y. (2016). How good are we at assessing the impact of ocean  
604 acidification in coastal systems? Limitations, omissions and strengths of commonly used  
605 experimental approaches with special emphasis on the neglected role of fluctuations. *Marine and*  
606 *Freshwater Research* 67(1). doi: 10.1071/MF14154.

607 Waldbusser G.G., Salisbury J.E. (2014). Ocean acidification in the coastal zone from an  
608 organism's perspective: multiple system parameters, frequency domains, and habitats. *Ann. Rev.*  
609 *Mar. Sci.* 6, 221-247.

610 Welch M., Watson S.A., Welsh J. *et al.* (2014). Effects of elevated CO<sub>2</sub> on fish behaviour  
611 undiminished by transgenerational acclimation. *Nature Clim Change* 4, 1086–1089.  
612 <https://doi.org/10.1038/nclimate2400>.

613 Wootton J.T., Pfister C.A., Forester J.D. (2008). Dynamic patterns and ecological impacts of  
614 declining ocean pH in a high-resolution multi-year dataset. *Proc Natl Acad Sci.* 105: 18848-  
615 18853.

616 **Tables**

617 **Table 1.** Mean values for seawater parameters  $\pm 1$  SD throughout the entirety of the experimental  
 618 duration. Average values of  $p\text{CO}_2$  and  $\text{pH}_T$  for fluctuating treatments are from samples taken at different  
 619 times of the day to reflect the middle, minimum, and maximum values. Range of  $p\text{CO}_2$  and  $\text{pH}_T$  represent  
 620 the average range of all replicates within a treatment between the minimum and maximum values.  
 621 Temperature values provided are from a portable Mettler Toledo probe.

| Parameter                                     | $p\text{CO}_2$ treatment                     |                                              |                                                             |                                                             |
|-----------------------------------------------|----------------------------------------------|----------------------------------------------|-------------------------------------------------------------|-------------------------------------------------------------|
|                                               | Static present day<br>(500 $\mu\text{atm}$ ) | Static future day<br>(1000 $\mu\text{atm}$ ) | Fluctuating present day<br>(500 $\pm$ 200 $\mu\text{atm}$ ) | Fluctuating future day<br>(1000 $\pm$ 200 $\mu\text{atm}$ ) |
| Average $\text{pH}_T$                         | 7.98 $\pm$ 0.02                              | 7.77 $\pm$ 0.02                              | 8.03 $\pm$ 0.04                                             | 7.74 $\pm$ 0.02                                             |
| Min. $\text{pH}_T$                            | -                                            | -                                            | 7.95 $\pm$ 0.04                                             | 7.67 $\pm$ 0.03                                             |
| Max. $\text{pH}_T$                            | -                                            | -                                            | 8.07 $\pm$ 0.04                                             | 7.81 $\pm$ 0.02                                             |
| $\text{pH}_T$ range                           | -                                            | -                                            | 0.13 $\pm$ 0.02                                             | 0.14 $\pm$ 0.02                                             |
| Average $p\text{CO}_2$<br>( $\mu\text{atm}$ ) | 512 $\pm$ 33                                 | 918 $\pm$ 49                                 | 458 $\pm$ 46                                                | 989 $\pm$ 54                                                |
| Min. $p\text{CO}_2$<br>( $\mu\text{atm}$ )    | -                                            | -                                            | 408 $\pm$ 45                                                | 826 $\pm$ 40                                                |
| Max. $p\text{CO}_2$<br>( $\mu\text{atm}$ )    | -                                            | -                                            | 566 $\pm$ 80                                                | 1161 $\pm$ 61                                               |
| $p\text{CO}_2$ range<br>( $\mu\text{atm}$ )   | -                                            | -                                            | 158 $\pm$ 46                                                | 335 $\pm$ 53                                                |
| TA ( $\mu\text{mol kg}^{-1}$ )                | 2880 $\pm$ 63                                | 2470 $\pm$ 63                                | 2494 $\pm$ 35                                               | 2481 $\pm$ 33                                               |
| Min. TA ( $\mu\text{mol kg}^{-1}$ )           | -                                            | -                                            | 2493 $\pm$ 86                                               | 2476 $\pm$ 98                                               |
| Max. TA ( $\mu\text{mol kg}^{-1}$ )           | -                                            | -                                            | 2539 $\pm$ 49                                               | 2512 $\pm$ 23                                               |
| Temperature<br>( $^{\circ}\text{C}$ )         | 28.5 $\pm$ 0.2                               | 28.6 $\pm$ 0.1                               | 28.4 $\pm$ 0.1                                              | 28.5 $\pm$ 0.2                                              |
| Salinity                                      | 34.4 $\pm$ 0.5                               | 34.4 $\pm$ 0.5                               | 34.4 $\pm$ 0.5                                              | 34.4 $\pm$ 0.5                                              |

622

623

624 **Table 2.** Comparison of percent time ( $\pm$  SE) fish from each treatment group spent in either chemical cue  
 625 presented in each of the three chemosensory trials (n=30). The p-values represent one-sample *t*-tests  
 626 conducted on percent time spent in cue against an expected value of 50%. Significance values are  
 627 reflected with an asterisk and represent a preference toward the cue tested (left side chemical cue  
 628 comparison column).

| Treatment   | Fluctuation | Chemical cue comparison (%) |                    | p-value                  |
|-------------|-------------|-----------------------------|--------------------|--------------------------|
|             |             | Non-predator                | Untreated seawater |                          |
| Present Day | Static      | 54.27 $\pm$ 2.16            | 45.73 $\pm$ 2.16   | 0.062                    |
| Present Day | Fluctuating | 45.94 $\pm$ 3.22            | 54.06 $\pm$ 3.22   | 0.222                    |
| Future Day  | Static      | 45.42 $\pm$ 2.10            | 54.58 $\pm$ 2.10   | 0.042 *                  |
| Future Day  | Fluctuating | 49.17 $\pm$ 4.95            | 50.83 $\pm$ 4.95   | 0.860                    |
|             |             | Predator                    | Untreated seawater |                          |
| Present Day | Static      | 31.46 $\pm$ 4.29            | 68.54 $\pm$ 4.29   | 3.702 $\times 10^{-4}$ * |
| Present Day | Fluctuating | 63.85 $\pm$ 3.33            | 36.15 $\pm$ 3.33   | 5.849 $\times 10^{-6}$ * |
| Future Day  | Static      | 27.40 $\pm$ 3.64            | 72.60 $\pm$ 3.64   | 5.409 $\times 10^{-4}$ * |
| Future Day  | Fluctuating | 53.65 $\pm$ 2.48            | 46.35 $\pm$ 2.48   | 0.158                    |
|             |             | Predator                    | Non-predator       |                          |
| Present Day | Static      | 26.46 $\pm$ 2.78            | 73.54 $\pm$ 2.78   | 6.935 $\times 10^{-8}$ * |
| Present Day | Fluctuating | 72.50 $\pm$ 3.41            | 27.50 $\pm$ 3.41   | 6.752 $\times 10^{-7}$ * |
| Future Day  | Static      | 26.35 $\pm$ 3.25            | 73.65 $\pm$ 3.25   | 2.6 $\times 10^{-6}$ *   |
| Future Day  | Fluctuating | 49.06 $\pm$ 3.57            | 50.94 $\pm$ 3.57   | 0.611                    |

629

630



631 **Table 3.** Comparison of percent time ( $\pm$  SE) fish from each treatment group spent in either chemical cue  
 632 presented in each of the three chemosensory trials (n=30). The p-values represent comparisons between  
 633 treatment groups in each chemical cue (conducted via ANOVA), where: SPD = Static Present Day; SFD  
 634 = Static Future Day; FPD = Fluctuating Present Day; and FFD = Fluctuating Future Day. Asterisks reflect  
 635 significant differences.

| Treatment   | Fluctuation | Chemical cue comparison (%) |                    | p-value                                                                                                                                     |
|-------------|-------------|-----------------------------|--------------------|---------------------------------------------------------------------------------------------------------------------------------------------|
|             |             | Non-predator                | Untreated seawater |                                                                                                                                             |
| Present Day | Static      | 54.27 $\pm$ 2.16            | 45.73 $\pm$ 2.16   | SPD-SFD: 0.493<br>SPD-FPD: 0.417<br>SPD-FFD: 0.736                                                                                          |
| Future Day  | Static      | 45.94 $\pm$ 3.22            | 54.06 $\pm$ 3.22   | SFD-FPD: 0.999<br>SFD-FFD: 0.979<br>FPD-FFD: 0.954                                                                                          |
| Present Day | Fluctuating | 45.42 $\pm$ 2.10            | 54.58 $\pm$ 2.10   |                                                                                                                                             |
| Future Day  | Fluctuating | 49.17 $\pm$ 4.95            | 50.83 $\pm$ 4.95   |                                                                                                                                             |
|             |             | Predator                    | Untreated seawater |                                                                                                                                             |
| Present Day | Static      | 31.46 $\pm$ 4.29            | 68.54 $\pm$ 4.29   | SPD-SFD: $1.5 \times 10^{-6}$ *<br>SPD-FPD: 0.888<br>SPD-FFD: $8.359 \times 10^{-4}$ *                                                      |
| Future Day  | Static      | 63.85 $\pm$ 3.33            | 36.15 $\pm$ 3.33   | SFD-FPD: $1 \times 10^{-7}$ *<br>SFD-FFD: 0.353<br>FPD-FFD: $6.21 \times 10^{-5}$ *                                                         |
| Present Day | Fluctuating | 27.40 $\pm$ 3.64            | 72.60 $\pm$ 3.64   |                                                                                                                                             |
| Future Day  | Fluctuating | 53.65 $\pm$ 2.48            | 46.35 $\pm$ 2.48   |                                                                                                                                             |
|             |             | Predator                    | Non-predator       |                                                                                                                                             |
| Present Day | Static      | 26.46 $\pm$ 2.78            | 73.54 $\pm$ 2.78   | SPD-SFD: $<1 \times 10^{-7}$ *<br>SPD-FPD: 0.999<br>SPD-FFD: 0.003 *<br>SFD-FPD: $<1 \times 10^{-7}$ *<br>SFD-FFD: $1.296 \times 10^{-4}$ * |
| Future Day  | Static      | 72.50 $\pm$ 3.41            | 27.50 $\pm$ 3.41   | FPD-FFD: 0.004 *                                                                                                                            |
| Present Day | Fluctuating | 26.35 $\pm$ 3.25            | 73.65 $\pm$ 3.25   |                                                                                                                                             |
| Future Day  | Fluctuating | 49.06 $\pm$ 3.57            | 50.94 $\pm$ 3.57   |                                                                                                                                             |

636

637

638

639 **Figures**

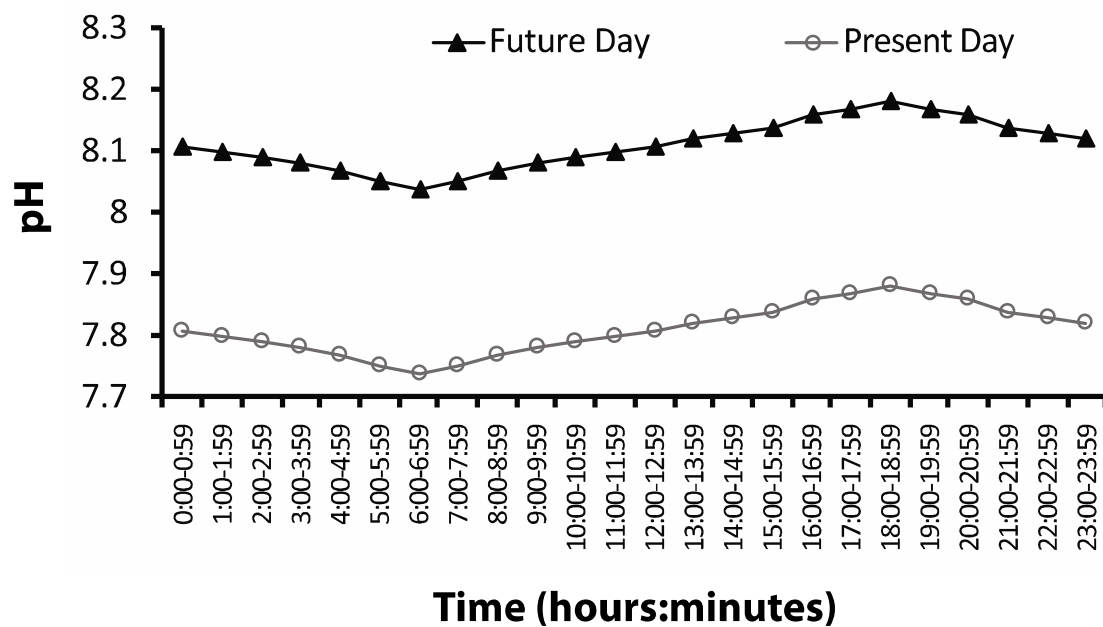

640

641

642 **Fig 1.** Target diel pH fluctuations for present day control (black, closed triangles) and future

643 day treatment (gray, opened circles) tanks. APEX probe error  $\pm 0.02$ .

644

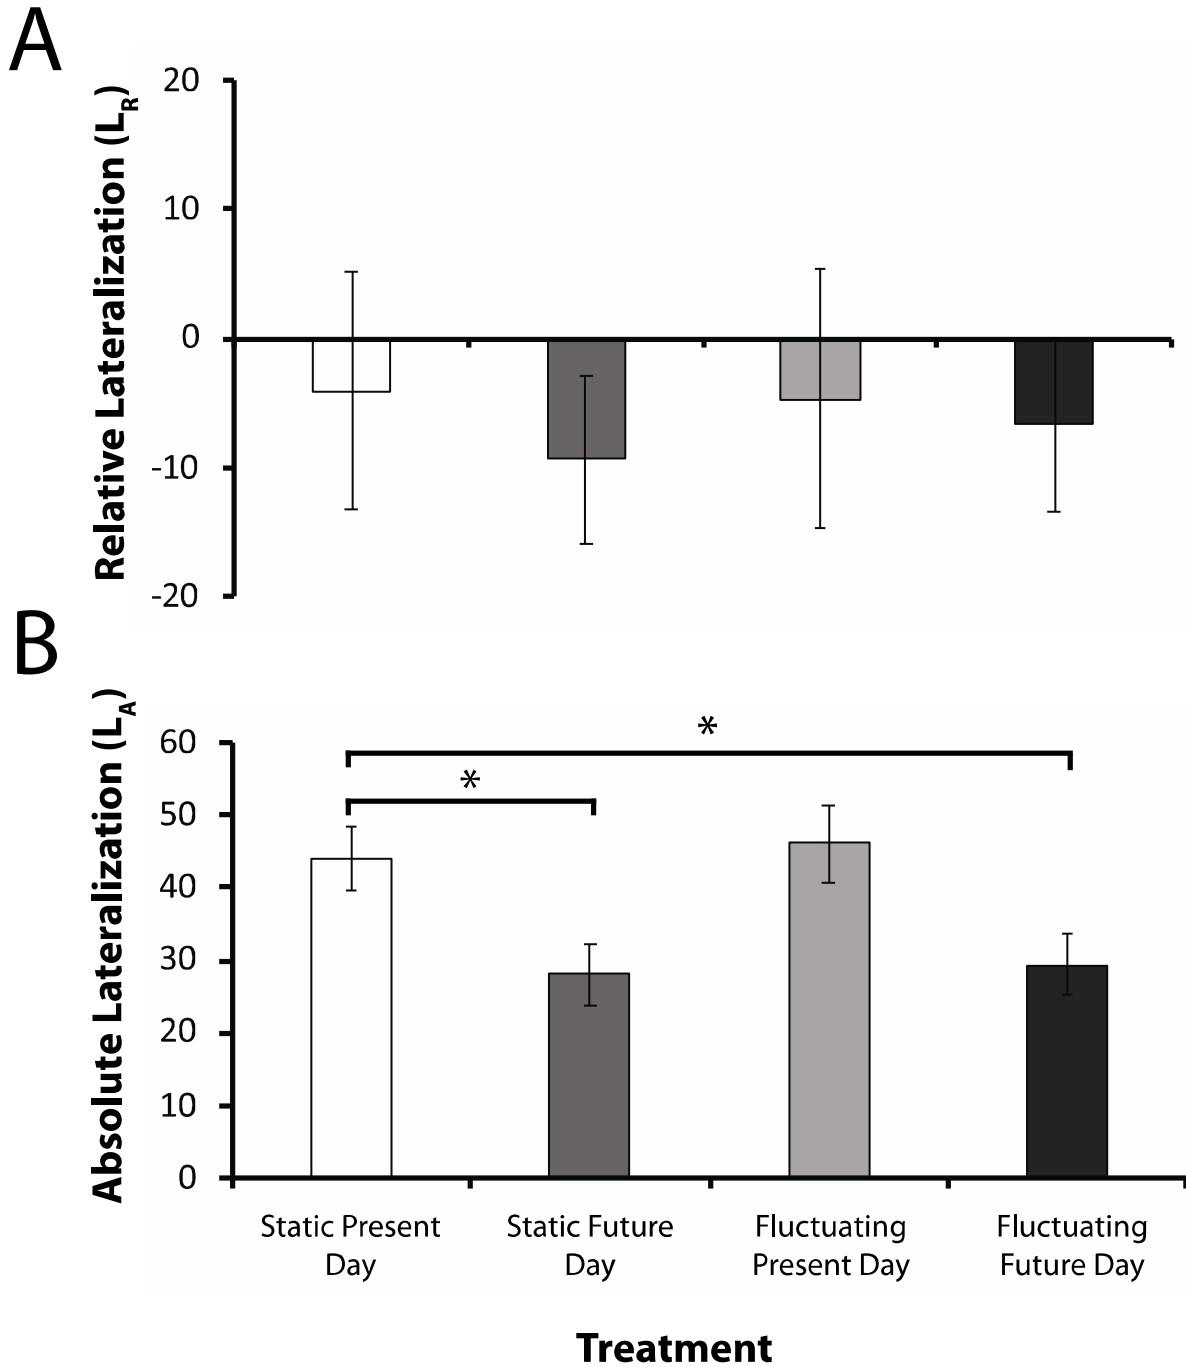

645  
646 **Figure 2. A)** Relative lateralization ( $L_R$ ) of juvenile *Amphiprion percula* (mean  $\pm$  S.E.). Positive and  
647 negative values on the y-axis indicate either a right or left group turning preference, respectively. **B)**  
648 Absolute lateralization ( $L_A$ ) of juvenile *Amphiprion percula* (mean  $\pm$  S.E.). Significant differences ( $p <$   
649  $0.05$ ) between groups are represented by an asterisk. A total of 30 fish from each  $p\text{CO}_2$  treatment group  
650 were used in the detour test.

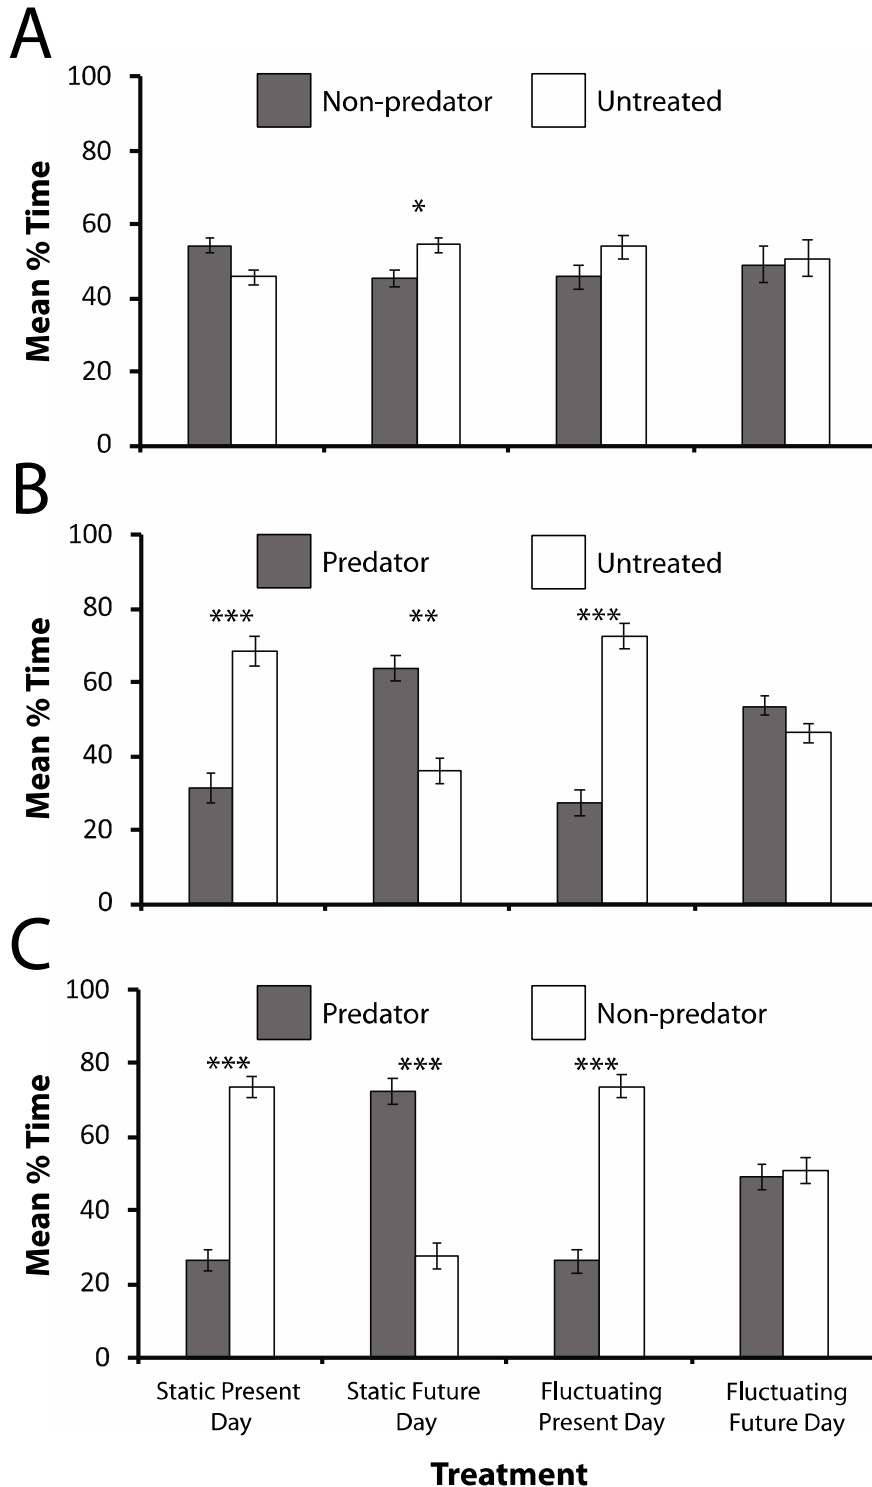

651  
 652 **Figure 3.** Mean percentage of time ( $\pm$  S.E.) juvenile *Amphiprion percula* spent in different chemical cues  
 653 presented in a two-channel choice flume. A total of 20 fish from each  $p\text{CO}_2$  treatment group were used  
 654 per chemical cue trial with a choice of: **A**) non-predator (Tang) and untreated (control), **B**) predator (Cod)  
 655 and untreated (control), and **C**) predator (Cod) and non-predator (Tang). Significant differences between  
 656 chemical cue preference within treatment groups are represented by asterisks, where: \* =  $p < 0.05$ ; \*\* =  $p$   
 657  $< 0.001$ ; \*\*\* =  $p < 0.00001$ .
